# Supplementary material for: Syntheses, crystal structures, and properties of three new lanthanum(iii) vanadium iodates
Source: Royal Society of Chemistry journal article supplement (doi:10.1039/c0dt00305k), 2010-01-01
Supplement: c0dt00305k.pdf [file c0dt00305k.pdf]

## Syntheses, Crystal Structures, and Properties of Three New Lanthanum(III) Vanadium Iodates

Chuan-Fu Sun,<sup>a,b</sup> Ting Hu,<sup>a,b</sup> Xiang Xu,<sup>a</sup> Jiang-Gao Mao<sup>\*a</sup>

### Supporting Information

Table S1. The state energies (eV) of the lowest conduction band (L-CB) and the highest valence band (H-VB) of the three compounds.

| Compound                            | k-point                  | L-CB    | H-VB        |
|-------------------------------------|--------------------------|---------|-------------|
| LaVO(IO <sub>3</sub> ) <sub>5</sub> | Z (0.000, 0.000, 0.500)  | 1.80538 | -0.03615    |
|                                     | G (0.000, 0.000, 0.000)  | 1.77737 | -0.02481    |
|                                     | Y (0.000, 0.500, 0.000)  | 1.80275 | -0.03083    |
|                                     | A (-0.500, 0.500, 0.000) | 1.70472 | -0.03289    |
|                                     | B (-0.500, 0.000, 0.000) | 1.70165 | -0.02831    |
|                                     | D (-0.500, 0.000, 0.500) | 1.73478 | 0           |
|                                     | E (-0.500, 0.500, 0.500) | 1.73592 | -9.60018E-4 |
|                                     | C (0.000, 0.500, 0.500)  | 1.80838 | -0.04235    |
|                                     | G (0.000, 0.000, 0.000)  | 2.56173 | 0           |
|                                     | Z (0.000, 0.000, 0.500)  | 2.55052 | -0.11088    |
|                                     | T (-0.500, 0.000, 0.500) | 2.57004 | -0.13066    |
|                                     | Y (-0.500, 0.000, 0.000) | 2.65569 | -0.0932     |

|                                                                     |                          |         |           |
|---------------------------------------------------------------------|--------------------------|---------|-----------|
| LaV <sub>2</sub> O <sub>6</sub> (IO <sub>3</sub> )                  | S (-0.500, 0.500, 0.000) | 2.70836 | -0.13874  |
|                                                                     | X (0.000, 0.500, 0.000)  | 2.64429 | -0.10728  |
|                                                                     | U (0.000, 0.500, 0.500)  | 2.55247 | -0.15366  |
|                                                                     | R (-0.500, 0.500, 0.500) | 2.58301 | -0.1765   |
| LaVO <sub>2</sub> (IO <sub>3</sub> ) <sub>4</sub> ·H <sub>2</sub> O | Z (0.000, 0.000, 0.500)  | 2.86923 | -0.068798 |
|                                                                     | G (0.000, 0.000, 0.000)  | 2.77154 | -0.09801  |
|                                                                     | Y (0.000, 0.500, 0.000)  | 2.88285 | -0.10217  |
|                                                                     | A (-0.500, 0.500, 0.000) | 2.84439 | -0.06138  |
|                                                                     | B (-0.500, 0.000, 0.000) | 2.70804 | -0.06181  |
|                                                                     | D (-0.500, 0.000, 0.500) | 2.66687 | 0         |
|                                                                     | E (-0.500, 0.500, 0.500) | 2.7497  | -0.00754  |
|                                                                     | C (0.000, 0.500, 0.500)  | 2.92196 | -0.08085  |

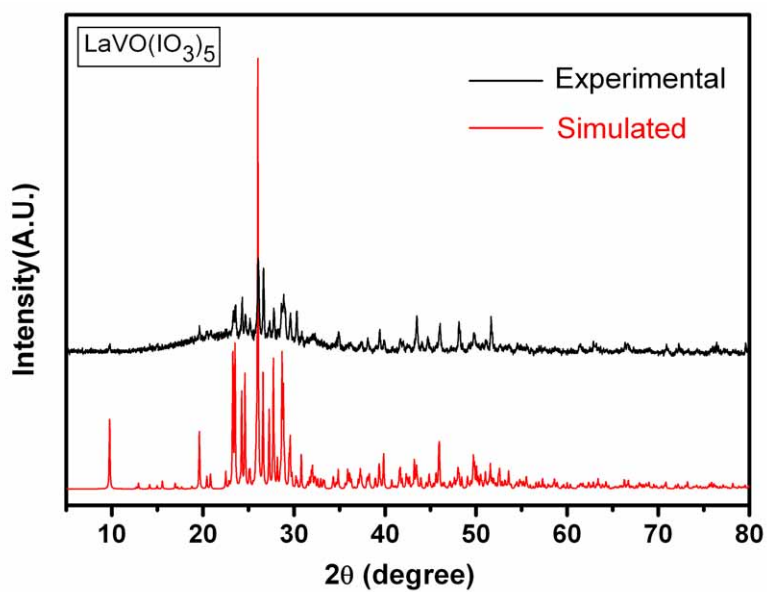

(a)

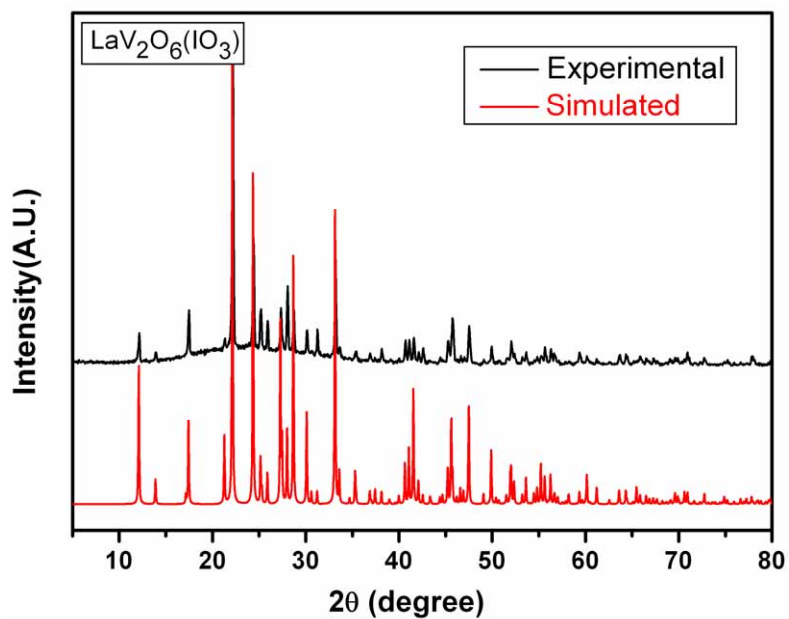

(b)

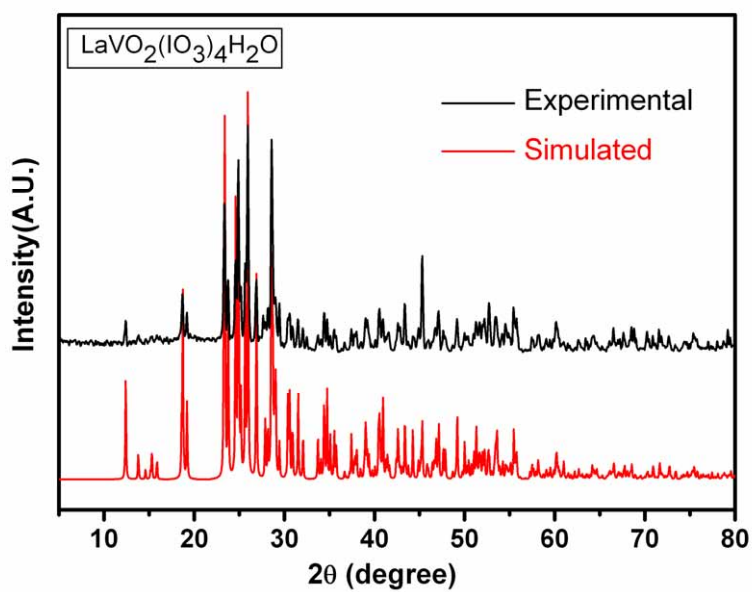

(c)

Figure S1. Experimental and simulated X-ray powder diffraction patterns for  $\text{LaVO}(\text{IO}_3)_5$  (a),  $\text{LaV}_2\text{O}_6(\text{IO}_3)$  (b), and  $\text{LaVO}_2(\text{IO}_3)_4 \cdot \text{H}_2\text{O}$  (c).

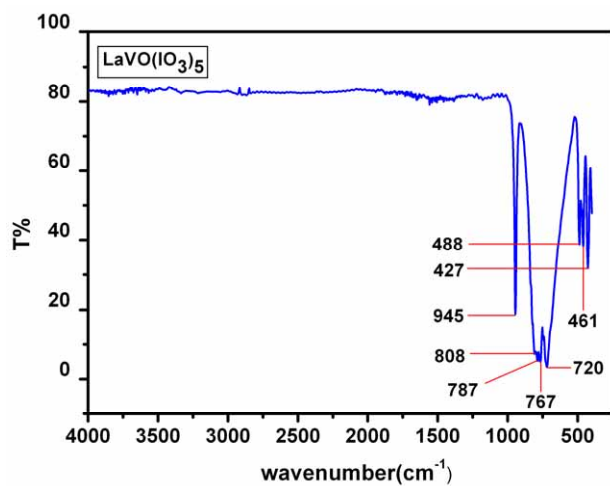

(a)

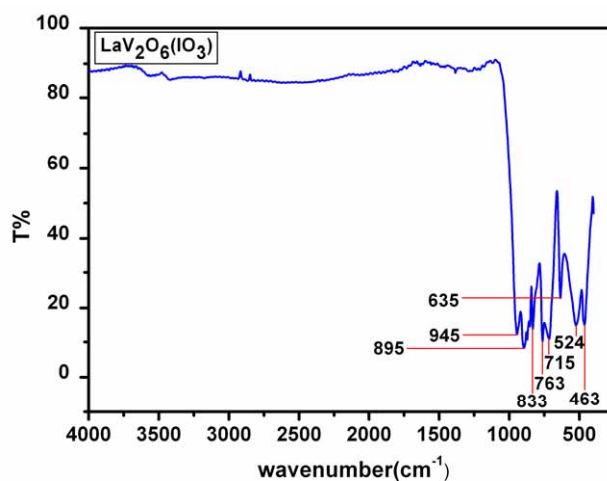

(b)

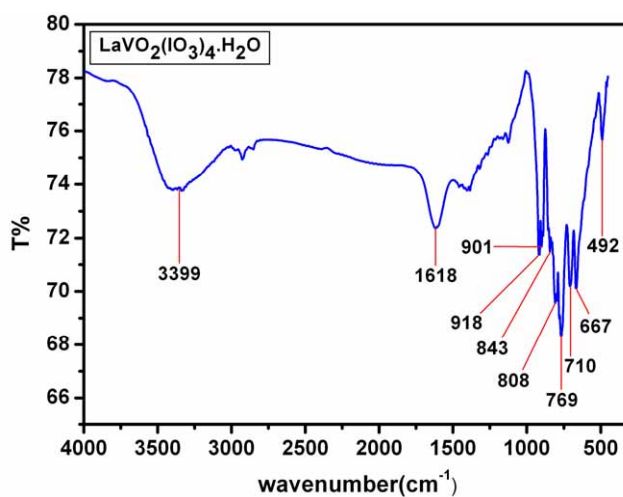

(c)

Figure S2. The infrared spectra for LaVO(IO<sub>3</sub>)<sub>5</sub> (a), LaV<sub>2</sub>O<sub>6</sub>(IO<sub>3</sub>) (b), and LaVO<sub>2</sub>(IO<sub>3</sub>)<sub>4</sub>·H<sub>2</sub>O (c).

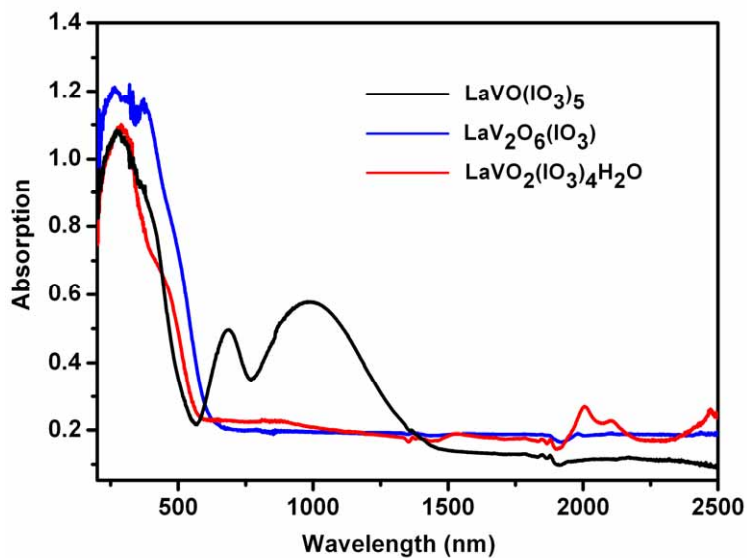

Figure S3. UV absorption spectra for  $\text{LaVO}(\text{IO}_3)_5$ ,  $\text{LaV}_2\text{O}_6(\text{IO}_3)$ , and  $\text{LaVO}_2(\text{IO}_3)_4 \cdot \text{H}_2\text{O}$ .

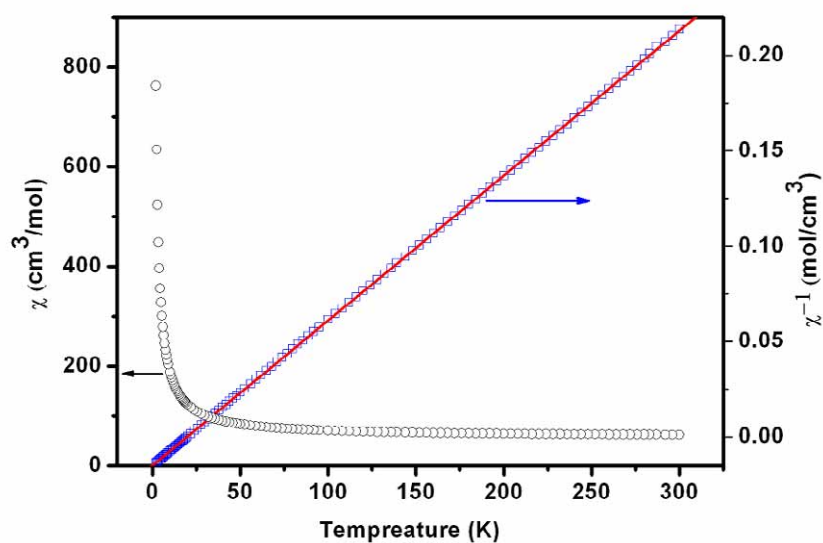

Figure S4.  $\chi$  versus T and  $1/\chi$  versus T plots for  $\text{LaVO}(\text{IO}_3)_5$ .

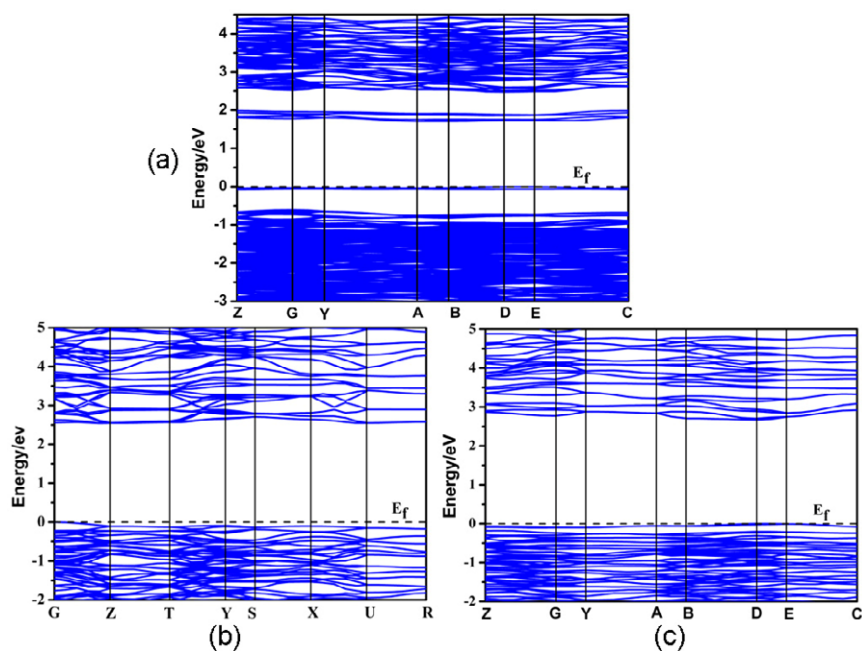

Figure S5. Band structures for the crystals  $\text{LaVO}(\text{IO}_3)_5$  (a),  $\text{LaV}_2\text{O}_6(\text{IO}_3)$  (b), and  $\text{LaVO}_2(\text{IO}_3)_4 \cdot \text{H}_2\text{O}$  (c) (the Fermi level is set at 0 eV).

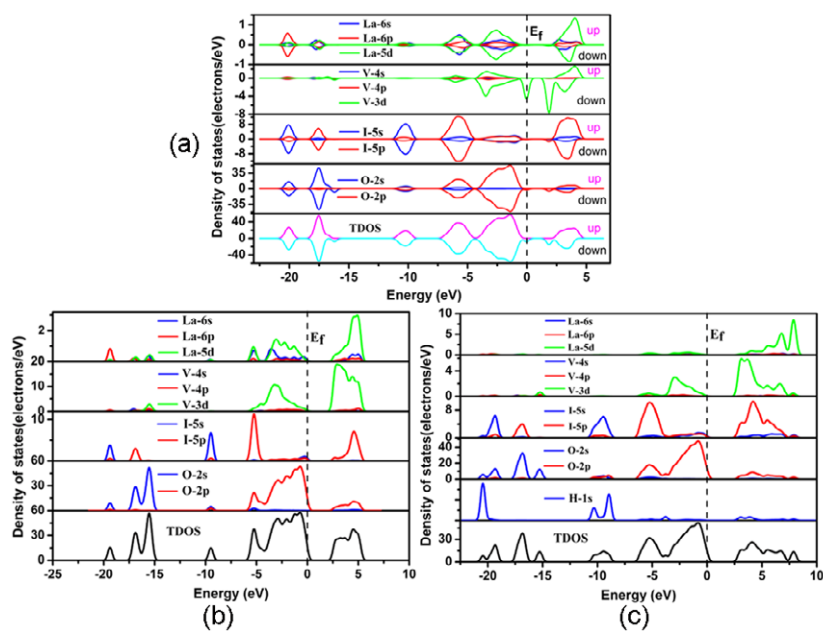

Fig. S6. The total density of states and partial density of states for  $\text{LaVO}(\text{IO}_3)_5$  (a),  $\text{LaV}_2\text{O}_6(\text{IO}_3)$  (b), and  $\text{LaVO}_2(\text{IO}_3)_4 \cdot \text{H}_2\text{O}$  (c) (the Fermi level is set at 0 eV).
